# Supplementary material
Source: publisher figshare collection journal article supplement (https://tandf.figshare.com/ndownloader/files/17489423)
Supplement: Supplementary file 1 [file 17489423]

**Supplemental Information for**

**Identifying time-dependent changes in the morphology of an individual aerosol particle from their light scattering patterns**

Allen Haddrell1, Grazia Rovelli2, David Lewis3, Tanya Church3, and Jonathan Reid1

1School of Chemistry

University of Bristol

Bristol, UK

2Ernest Orlando Lawrence Berkeley National Laboratory

University of California Berkley

Berkley, USA

3Chiesi Farmaceutici S.p.A

Chippenham, UK

**
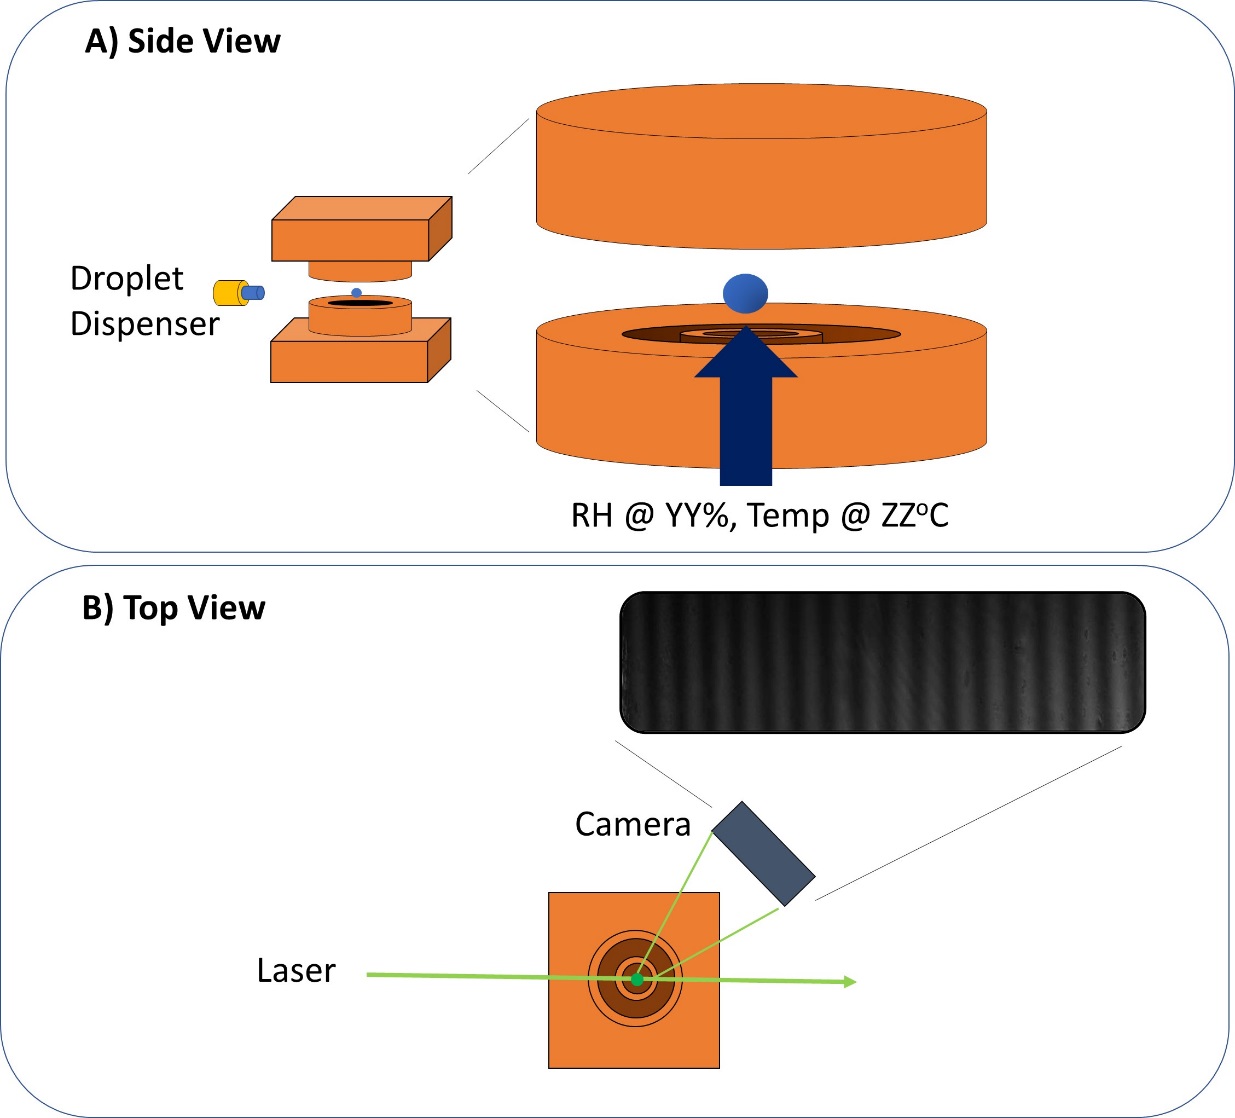
**

**Figure S1**: Experimental setup: the comparative kinetic electrodynamic balance (CK-EDB). Description of the operation of the CK-EDB can be found in section 2.1.

**S2. Presence of inclusions on a droplet’s calculated size**

We consider the effect of the presence of polystyrene nanospheres within a spherical droplet on the intensity of scattered light, on the angular position of the peaks in the phase function and on the overall droplet size retrieved with the geometric optical approxiamtion.

Figure S1 shows the scattered light at a fixed angle (45°) as a function of droplet size for an evaporating water droplet (refractive index of water at 532 nm = 1.335), simulated with Mie theory (bottom, black) and experimental (middle, red), and for a water droplet with inclusions (top, blue, 450 nm polystyrene beads with refractive index of 1.605). For the experimental curves, the droplet size was determined with geometric optics approximation. The collected data for the pure water droplet (red) match well with predictions from Mie theory, both in the position and intensity of the scattered light peaks. In the case of a water droplet with spherical inclusions (blue), the collected scattered light at 45° broadly tracks the main peaks of the other two curves but it results noisier because of the presence of the inclusions.

**Figure S2:** Forward scattered light at 45° as a function of droplet size. Black: homogeneous water droplet, Mie theory calculation; red: experimental data for a homogeneous water droplet; blue: experimental data for a water droplet with inclusions (450 nm polystyrene beads).

This is in agreement with what was found by Ngo and Pinnick (Ngo, D., & Pinnick, R. G. (2008). Journal of the Optical Society of America A, 11(4), 1352.) in the case of glycerol droplets (radius range of 3-9 µm) doped with variable concentrations of polystyrene latex sphere (30-105 nm in diameter) in an electrodynamic trap; they found that with increasing concentrations of inclusions the collected scattered light becomes more noisy and that the characteristic resonance peaks in scattered light at a single angle become suppressed (see Figures 5 and 6 in their manuscript). Ngo and Pinnick indicate that these fluctuations in scattered light intensity could be the result of constructive and destructive interference of light scattered by single or agglomerate inclusions moving within the spherical droplet volume and by the rotation of the droplet itself within the trap. Gu et al. (Gu, J., Ruekgauer, T. E., & Armstrong, R. L. (1993). Optics Letters, 18(16), 1293–1295) reported phase functions for similar aerosol droplets (glycerol droplets containing 502 nm latex spheres) confined in an electrodynamic balance. They indicate that for such aerosol systems with inclusions the peaks positions and their average separation in the phase function remains constant over short time intervals (since glycerol evaporates slowly), whereas the relative amplitudes of the peaks vary apparently randomly from frame to frame. Gu et al. also performed some simple light scattering calculations (using the Fraunhofer diffraction approximation) for the case of a 2D disc in the absence and presence of small inclusions; analogously to their experimental data, they found that the presence of scattering inclusions causes a perturbation of the intensity of the peaks in the calculate phase function, but that the peaks positions remain unaltered (see Figure 2 in their manuscript). Gu et al. suggest that these fluctuations in the intensity of the peaks in the phase function is caused by the spherical inclusions diffusing randomly within the droplet.

Since these literature studies suggest that the presence of inclusions causes random fluctuations in the scattered light intensity leaving unaltered the position of the peaks in the phase function, we can assume that the use of geometric optics for the sizing of droplets containing small spherical inclusions in relatively low concentration (less than 1% in volume in this work, see Figure 10B) is adequate.


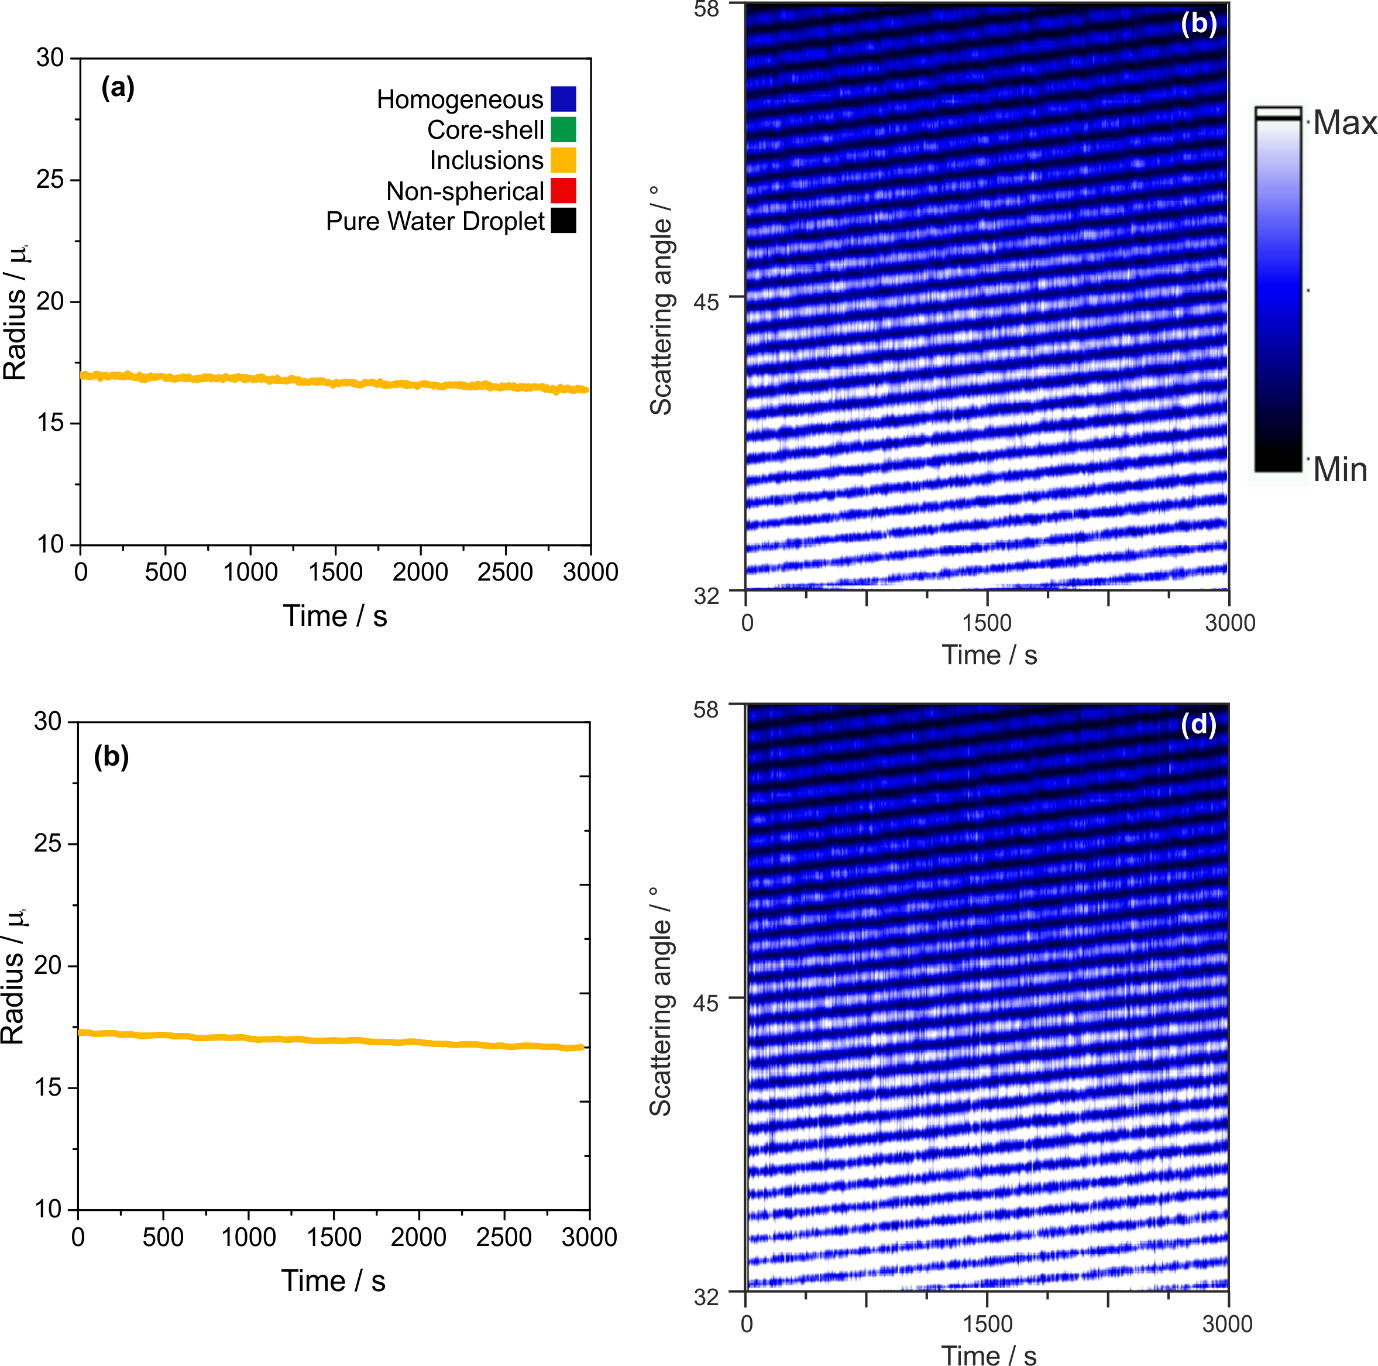


**Figure S3:** Slowly evaporating glycerol droplets either containing 300 nm ((A) and (B)) or 700 nm ((C) and (D)) nanospheres. Reported as either the radius as a function of time ((A) and (C)) or the cumulative phase functions ((B) and (D)).

**Figure S4:** Percentage error on the reported radius of modelled core-shell droplet radius when estimated using the geometric approximation to size. Each panel refers to a different refractive index of the shell as indicated in the figure, whereas the refractive index of the core is kept constant at 1.335 (pure water). The error is reported as a percentage error (indicated by the colour scale) for each combination of overall droplet size (x axis) and core volume percentage (y axis). In most cases, the uncertainty associated to the presence of a core-shell structure and the application of the geometric optics approximation is less than 3.75% (light green and green datapoints), but as the core gets smaller, a larger deviation between the absolute radius and estimated radius is observed. An increasing difference between the refractive index of the core and the shell results in larger uncertainty on the radius calculated with geometric optics.

**Figure S5**: (a) Simulated phase functions at 532 nm for one core-shell droplet, three droplets with radial concentration gradient (i.e. refractive index gradient) and one homogeneous droplet. All particles have an overall radius of 18 µm. (b) Radial refractive index profiles corresponding to the simulated phase functions in panel a. The refractive index of the homogeneous case and of the core for the inhomogeneous droplets was set at 1.335 (pure water); the refractive index of the shell was set at 1.45 and radial gradients with different slopes were considered. All simulations were made with MiePlot (<http://www.philiplaven.com/mieplot.htm>). As the radial gradient becomes less steep (from top to bottom in panel a) the secondary structure typical of core-shell morphologies evidenced in the main manuscript (Figure 1) becomes less evident and the phase function resembles that for the homogeneous case.


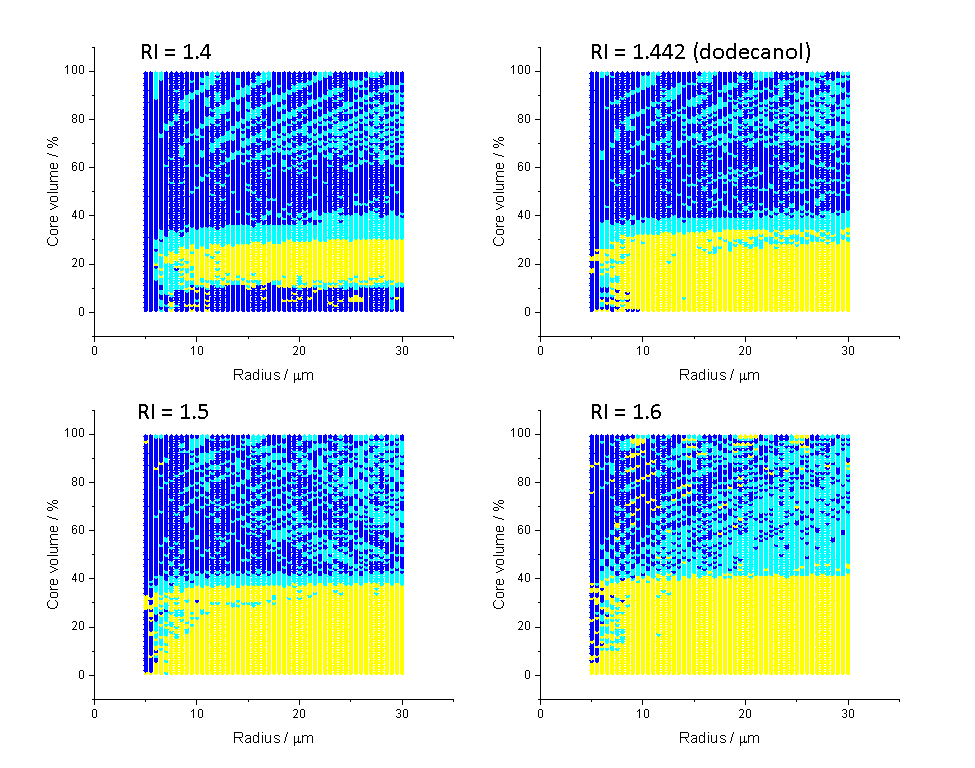


**Figure S6**. Predicted droplet morphology from the simulated phase functions of droplets with a core-shell structure. A-D show various shell/core ratios and refractive indexes. Accurate identification increases as the difference in refractive index between the core (1.333) and the shell increases. Dark blue = homogeneous, light blue = core/shell, yellow = inclusions.
